# Supplementary material for: Prevalence and management of severe asthma in the Nordic countries: findings from the NORDSTAR cohort
Source: PubMed Central journal article supplement — ERJ Open Res. 2023 Apr 3;9(2):00687-2022. doi: 10.1183/23120541.00687-2022 (PMC10068510; doi:10.1183/23120541.00687-2022), 2023-04-03
Supplement: 00687-2022.supplement.pdf [file 00687-2022.supplement.pdf]

# Supplementary material

## Title: Prevalence and management of severe asthma in Sweden, Norway, and Finland – Findings from the NORDSTAR cohort

**Table S1.** Data sources utilized in the study

|                                           | Sweden                                  | Norway                                        | Finland                                                | General content                                           |
|-------------------------------------------|-----------------------------------------|-----------------------------------------------|--------------------------------------------------------|-----------------------------------------------------------|
| <b>In- and outpatient specialist care</b> | Swedish National Patient Register; NBHW | N/A                                           | Care register for health care; THL                     | Diagnosis codes (ICD-9/10), dates and types of visit      |
| <b>Prescription medicines</b>             | Swedish Prescribed Drug Registry; NBHW  | Norwegian Prescription Database (NorPD); NIPH | Finnish Electronic Prescription Database (KANTA); KELA | Dispatch dates, type of medication, strengths, and dosage |
| <b>Mortality</b>                          | Swedish Causes of Death Registry; NBHW  | N/A                                           | Finnish Causes of Death Registry; Statistics Finland   | Date and cause of death                                   |

KELA: The Social Insurance Institution of Finland, NBHW: Swedish National Board of Health and Welfare, NIPH: Norwegian Institute of Public Health, NorPD: Norwegian Prescription Database, THL: National Institute for Health and Welfare.

**Table S2.** Definitions of study outcomes

| Outcome                            | Definition                                                                                                                                                                                                                                                                                                                                                                                                                                                             |
|------------------------------------|------------------------------------------------------------------------------------------------------------------------------------------------------------------------------------------------------------------------------------------------------------------------------------------------------------------------------------------------------------------------------------------------------------------------------------------------------------------------|
| Exacerbations                      | Dispensation of burst OCS (ATC: H02AB) or an asthma-related emergency department visit or an asthma-related hospital admission during 2018<br><br>If two exacerbations occur within 14 days of each other they are only counted as a single exacerbation. The 14 days are counted from each exacerbation to the next occurring, i.e., three or more exacerbations in sequence where each occurring within 14 days of the previous is counted as a single exacerbation. |
| Asthma-related ED visit            | <b>Definition for Swedish data</b><br>Asthma related outpatient visit where contact is <u>not</u> pre-arranged or planned.<br><br><b>Definition for Finnish data</b><br>Asthma related outpatient care contact and care contact coded as ED care contact<br><br>Not available in Norway.                                                                                                                                                                               |
| Asthma-related hospital admission  | Number of asthma-related inpatient care contacts during the study period<br>Not available in Norway.                                                                                                                                                                                                                                                                                                                                                                   |
| Treatment in specialist care       | ≥1 outpatient visit not at ED with either:<br><br>1. A primary diagnosis of asthma (ICD-10 codes: J45.x or J46.x)<br>or<br>2. A secondary diagnosis with asthma (ICD-10 codes: J45.x or J46.x) and any of the following primary diagnosis codes: (Jxx.x, R05.x – R09.x, Zxx.x).<br><br>Not available in Norway.                                                                                                                                                        |
| High SABA use                      | Dispensed equivalent of ≥600 doses (puffs) of SABA. When SABA is dispensed for use with nebulizers, one dose is defined as 2.5mg.                                                                                                                                                                                                                                                                                                                                      |
| Asthma control                     | <b>Uncontrolled asthma</b> is defined as:<br>1. ≥2 exacerbations (≥2 burst OCS and/or asthma related ED visits)<br><b>And/or</b><br>2. ≥1 asthma-related hospitalization<br><b>And/or</b><br>3. High SABA use (of ≥600 doses (puffs))                                                                                                                                                                                                                                  |
| Respiratory infections             | Defined as ≥1 prescription for antibiotics for respiratory infection (Table S4).                                                                                                                                                                                                                                                                                                                                                                                       |
| Hospital attendance with pneumonia | Defined as ≥1 emergency department (ED) visit or hospitalization with an associated primary or secondary ICD-10 code for pneumonia (Table S5). Not available in Norway.                                                                                                                                                                                                                                                                                                |

**Table S3.** Definition of comorbidities in the study

| Comorbidities                                        | Definition ATC codes                        | Definition ICD-10 codes (A-diagnosis)                          |
|------------------------------------------------------|---------------------------------------------|----------------------------------------------------------------|
| Allergy/allergic rhinitis                            | ≥2 prescriptions of R06 and/or S01G in 2018 | Allergic asthma (J45.0), J30 in 2018 or 5 years preceding 2018 |
| Rhinitis (non-allergic rhinitis + allergic rhinitis) | ≥2 prescriptions with R01AD in 2018         | J30-J32 in 2018 or 5 years preceding 2018                      |
| Nasal polyps                                         | NA                                          | J33 in 2018 or 5 years preceding 2018                          |

**Table S4.** Antibiotics for respiratory tract infection

| Type of antibiotic                                | Spectrum | ATC-codes                          |
|---------------------------------------------------|----------|------------------------------------|
| Penicillin                                        | Narrow   | J01CE02                            |
|                                                   | Broad    | J01CA02, J01CA04, J01CA01          |
| Penicillin combined with beta-lactamase inhibitor | Broad    | J01CR02                            |
| Cefuroxime                                        | Broad    | J01DC02                            |
| Macrolide                                         | Narrow   | J01FA10, J01FA06, J01FA09, J01FA01 |
| Quinolones (moxifloxacin, ciprofloxacin):         | Broad    | J01MA14, J01MA02                   |
| Cephalosporin                                     | Broad    | J01DB01                            |

**Table S5.** Hospital attendance with pneumonia

| Hospital attendance   | ICD-10-code                                                                                                                                                                                                           | Description |
|-----------------------|-----------------------------------------------------------------------------------------------------------------------------------------------------------------------------------------------------------------------|-------------|
| ED visit or admission | J18, J180, J181, J182, J188, J189, J15, J150, J151, J152, J153, J154, J155, J156, J157, J158, J159, J12, J120, J121, J122, J123, J128, J129, J13, J139, J14, J149, J16, J160, J168, J17, J170, J171, J172, J173, J178 | Pneumonia   |
